# Supplementary material
Source: PubMed Central journal article supplement (PMC4765488)

Supplementary Figure 2. Survival over two months among enterovirus-confirmed subjects, comparing subjects with a pleconaril concentration  $\geq 70$  ng/mL in the first 24 hours of treatment v. subjects who received placebo or who had pleconaril concentrations  $< 70$  ng/mL in the first 24 hours of treatment.

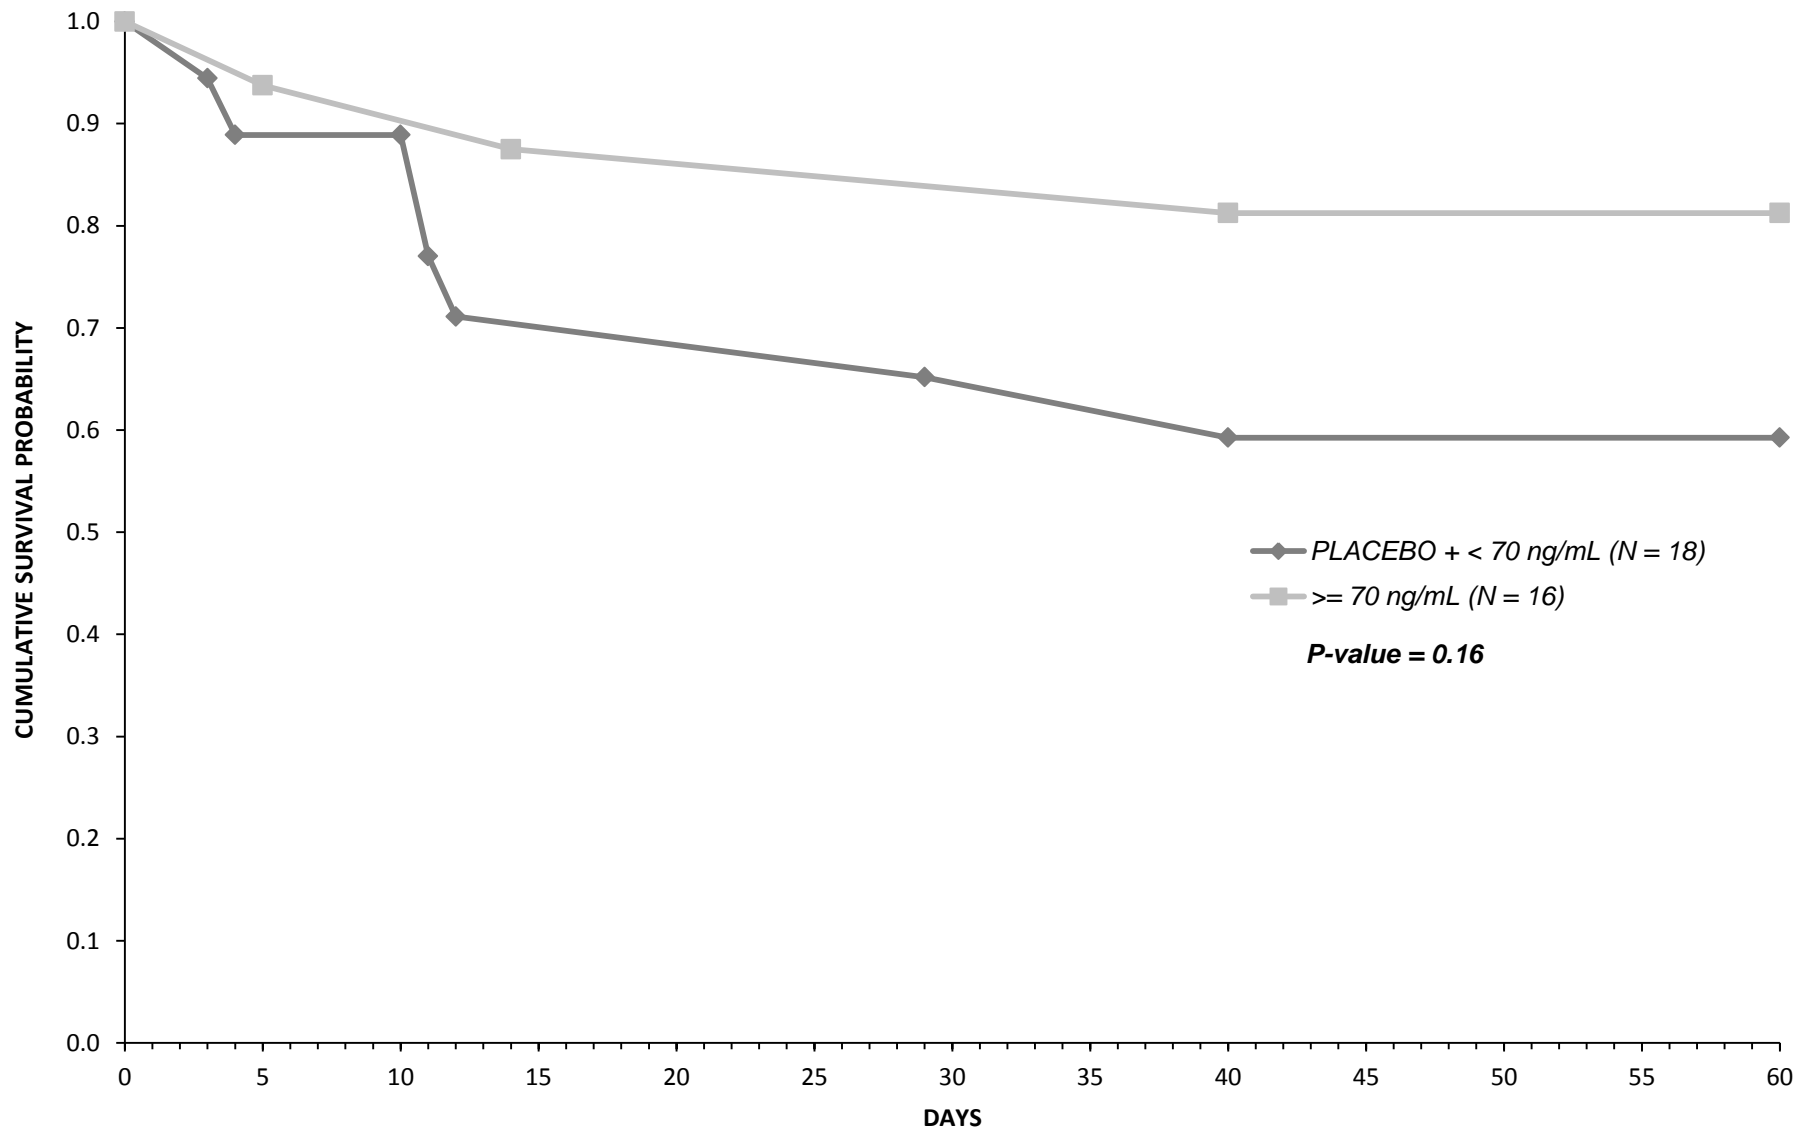

Supplement: supp_piv015_piv015supp_fig2.pdf [file supp_piv015_piv015supp_fig2.pdf]
